# Supplementary material for: Something Still Remains: Factors Affecting Tsunami Risk Perception on the Coasts Hit by the Reggio Calabria-Messina 1908 Event (Italy)
Source: MDPI journal article supplement (doi:10.3390/su15032787), 2023-02-03
Supplement: s1 [file s1]

Archive with 1 entries (1 files):
- sustainability-2164669-supplementary.pdf
