# Supplementary material for: Something Still Remains: Factors Affecting Tsunami Risk Perception on the Coasts Hit by the Reggio Calabria-Messina 1908 Event (Italy)
Source: MDPI journal article supplement (doi:10.3390/su15032787), 2023-02-03
Supplement: s1 [file s1 › sustainability-2164669-supplementary.pdf]

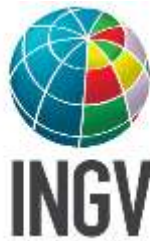

## ***Survey on risk perception of tsunami of seismogenetic origin***

**Please note: questions 13, 16, 18, 19, 22.1, 22.2, 22.3, 22.4, 23.2, 23.4 and 23.5 have been employed to build the RPI index and are therefore listed in blue**

### **SECTION 1: SOCIO-DEMOGRAPHIC DATA AND INFORMATION ON RESPONDENTS' BELONGING TERRITORY**

**Province**    |\_|\_|

**Municipality** \_\_\_\_\_

**1) Gender**    ☐ M    ☐ F    ☐ Not willing to declare it

**2) Age**            |\_|\_|

**3) Education**

- ☐ Elementary licence
- ☐ Middle school licence
- ☐ Diploma of completion of secondary education
- ☐ University Degree
- ☐ Master's degree, PhD, other post-lauream titles
- ☐ No qualification

**4) Nationality**

- ☐ Italian
- ☐ Non-Italian

**5) How is your family household composed? (multiple responses allowed)**

- ☐ I live alone
- ☐ With adult(s)
- ☐ With children under 6 years
- ☐ With children under 6 years
- ☐ With elders
- ☐ With disabled / reduced mobility persons

**6) How many kilometres far from the shore do you live?**

- ☐ Within 1 km
- ☐ From 1 to 3 km
- ☐ Over 3 km
- ☐ I don't know

**7) How many generations is your family living on this coastline?** (Even in different households in the same area)

- ☐ My family was here from before my great-grandparents
- ☐ My great-grandparents lived there
- ☐ My grandparents lived there
- ☐ My father or my mother lived there
- ☐ We are the first generation settled here

**SECTION 2: LEVEL OF AWARENESS AND SOURCES OF KNOWLEDGE ABOUT TSUNAMI HAZARD**

**8) Have you ever heard about tsunami?**

- ☐ Yes ☐ No (if not, go to question 14.)

**9) Can you tell me which words do you associate with tsunami?**

- ☐ Earthquake; ☐ maremoto; ☐ large wave; ☐ port; ☐ flooding; ☐ rough sea;
- ☐ inundation; ☐ sea withdrawal; ☐ currents; ☐ strong wind.

**10) Can you tell me which words do you associate with maremoto?**

- ☐ Earthquake; ☐ maremoto; ☐ large wave; ☐ port; ☐ flooding; ☐ rough sea;
- ☐ inundation; ☐ sea withdrawal; ☐ currents; ☐ strong wind.

**11) Can you tell me which word sound more familiar to you?**

- ☐ Tsunami ☐ Maremoto

**12) If you already heard about tsunami, from which sources?** (multiple responses allowed)

- ☐ Books
- ☐ Newspapers
- ☐ Tv News
- ☐ Radio
- ☐ Internet
- ☐ Television programs / channels about science (SuperQuark, Focus, NatGeo etc.)
- ☐ Movies
- ☐ Civil Protection (#IoNonRischio – Maremoti, drills).
- ☐ Region, provinces or municipalities
- ☐ Research institutions / Universities
- ☐ Friends / relatives
- ☐ Other (specify)

\_\_\_\_\_ Other

**13) In the Mediterranean Sea the possibility of a tsunami / maremoto is:**

|                                                 |                                                        |                                                                       |                                                      |                                                  |
|-------------------------------------------------|--------------------------------------------------------|-----------------------------------------------------------------------|------------------------------------------------------|--------------------------------------------------|
| Not<br>probable<br><br><input type="checkbox"/> | Somewhat<br>improbable<br><br><input type="checkbox"/> | Neither<br>improbable<br>nor probable<br><br><input type="checkbox"/> | Somewhat<br>probable<br><br><input type="checkbox"/> | Very<br>probable<br><br><input type="checkbox"/> |
|-------------------------------------------------|--------------------------------------------------------|-----------------------------------------------------------------------|------------------------------------------------------|--------------------------------------------------|

**14) In your opinion, what are the causes that may trigger a tsunami / maremoto?**  
(multiple responses allowed)

- ☐ Earthquakes
- ☐ Volcanic Eruptions
- ☐ Landslides
- ☐ Meteorites or asteroids at sea
- ☐ Weather phenomena
- ☐ Other (specify)

Other

☐ I don't know

**SECTION 3: CONTEXTUAL PERCEPTION OF TSUNAMI HAZARD**

**15) The coast of your municipality are mainly**

- ☐ Low and sandy
- ☐ Low and rocky
- ☐ With inlets / coves
- ☐ High and sandy
- ☐ High and rocky
- ☐ Without inlets / coves

**16) Do you think that the coasts of your municipality / province can be affected by a tsunami / maremoto?**

☐ Yes   ☐ No   ☐ I don't know

**17) In your opinion, which areas of the Mediterranean are more likely to be hit by tsunami / maremoto? (multiple responses allowed)**

|                                                                                                                                  |                          |
|----------------------------------------------------------------------------------------------------------------------------------|--------------------------|
| My own region or closer ones (Molise, Puglia, Calabria, Calabria, Sicily, Campania, Lower Tyrrhenian Sea, Gulf of Taranto)       | <input type="checkbox"/> |
| Western Mediterranean (Spain, Morocco, Algeria)                                                                                  | <input type="checkbox"/> |
| Central Mediterranean (Italy, France, Slovenia, Croatia, Montenegro, Bosnia Herzegovina, Albania, Greece, Tunisia, Malta, Libya) | <input type="checkbox"/> |
| Eastern Mediterranean (Coast Egypt, Israel, Lebanon, Syria, Turkey and Cyprus)?                                                  | <input type="checkbox"/> |
| I don't know                                                                                                                     | <input type="checkbox"/> |

18) If a tsunami / maremoto would hit your region, how much do you think the water level could rise with respect to the normal sea level?

- ☐ Less than 50 cm
- ☐ Between 50 cm and 1 meter
- ☐ Between 1 meter and 3 meters
- ☐ Over 3 meters
- ☐ I don't know

19) If a tsunami / maremoto would hit your region, how far from the shore could the water arrive?

- ☐ Less than 1 meter
- ☐ From 1 to 10 meters
- ☐ From 10 to 99 meters
- ☐ From hundred meters to kilometers
- ☐ I don't know

20) In your opinion, in case of tsunami / tsunami, to be dangerous for people near the shore how much should the water level with respect to the normal sea level?

- ☐ Less than 50 cm
- ☐ Between 50 cm and 1 meter
- ☐ Between 1 meter and 3 meters
- ☐ Over 3 meters
- ☐ I don't know

21) What kind of phenomena may precede the arrival of a tsunami / maremoto?

(How far do you agree with the following statements?)

- ☐ A strong or long-lasting earthquake

|                                               |                                               |                                                        |                                            |                                            |
|-----------------------------------------------|-----------------------------------------------|--------------------------------------------------------|--------------------------------------------|--------------------------------------------|
| Strongly disagree<br><input type="checkbox"/> | Somewhat disagree<br><input type="checkbox"/> | Neither agree nor disagree<br><input type="checkbox"/> | Somewhat agree<br><input type="checkbox"/> | Strongly Agree<br><input type="checkbox"/> |
|-----------------------------------------------|-----------------------------------------------|--------------------------------------------------------|--------------------------------------------|--------------------------------------------|

- ☐ Sea withdrawal

|                                               |                                               |                                                        |                                            |                                            |
|-----------------------------------------------|-----------------------------------------------|--------------------------------------------------------|--------------------------------------------|--------------------------------------------|
| Strongly disagree<br><input type="checkbox"/> | Somewhat disagree<br><input type="checkbox"/> | Neither agree nor disagree<br><input type="checkbox"/> | Somewhat agree<br><input type="checkbox"/> | Strongly Agree<br><input type="checkbox"/> |
|-----------------------------------------------|-----------------------------------------------|--------------------------------------------------------|--------------------------------------------|--------------------------------------------|

- ☐ Sea level rise

|                                               |                                               |                                                        |                                            |                                            |
|-----------------------------------------------|-----------------------------------------------|--------------------------------------------------------|--------------------------------------------|--------------------------------------------|
| Strongly disagree<br><input type="checkbox"/> | Somewhat disagree<br><input type="checkbox"/> | Neither agree nor disagree<br><input type="checkbox"/> | Somewhat agree<br><input type="checkbox"/> | Strongly Agree<br><input type="checkbox"/> |
|-----------------------------------------------|-----------------------------------------------|--------------------------------------------------------|--------------------------------------------|--------------------------------------------|

☐ Strong sea currents

|                                               |                                               |                                                        |                                            |                                            |
|-----------------------------------------------|-----------------------------------------------|--------------------------------------------------------|--------------------------------------------|--------------------------------------------|
| Strongly disagree<br><input type="checkbox"/> | Somewhat disagree<br><input type="checkbox"/> | Neither agree nor disagree<br><input type="checkbox"/> | Somewhat agree<br><input type="checkbox"/> | Strongly Agree<br><input type="checkbox"/> |
|-----------------------------------------------|-----------------------------------------------|--------------------------------------------------------|--------------------------------------------|--------------------------------------------|

☐ A strong and long-lasting uproar

|                                               |                                               |                                                        |                                            |                                            |
|-----------------------------------------------|-----------------------------------------------|--------------------------------------------------------|--------------------------------------------|--------------------------------------------|
| Strongly disagree<br><input type="checkbox"/> | Somewhat disagree<br><input type="checkbox"/> | Neither agree nor disagree<br><input type="checkbox"/> | Somewhat agree<br><input type="checkbox"/> | Strongly Agree<br><input type="checkbox"/> |
|-----------------------------------------------|-----------------------------------------------|--------------------------------------------------------|--------------------------------------------|--------------------------------------------|

**22) Try to figure out the effects of a tsunami / tsunami on the coasts of your region.  
How far do you agree with the following statements?**

☐ Deaths or serious injuries

|                                               |                                               |                                                        |                                            |                                            |
|-----------------------------------------------|-----------------------------------------------|--------------------------------------------------------|--------------------------------------------|--------------------------------------------|
| Strongly disagree<br><input type="checkbox"/> | Somewhat disagree<br><input type="checkbox"/> | Neither agree nor disagree<br><input type="checkbox"/> | Somewhat agree<br><input type="checkbox"/> | Strongly Agree<br><input type="checkbox"/> |
|-----------------------------------------------|-----------------------------------------------|--------------------------------------------------------|--------------------------------------------|--------------------------------------------|

☐ Damage / destruction of households, buildings or infrastructures

|                                               |                                               |                                                        |                                            |                                            |
|-----------------------------------------------|-----------------------------------------------|--------------------------------------------------------|--------------------------------------------|--------------------------------------------|
| Strongly disagree<br><input type="checkbox"/> | Somewhat disagree<br><input type="checkbox"/> | Neither agree nor disagree<br><input type="checkbox"/> | Somewhat agree<br><input type="checkbox"/> | Strongly Agree<br><input type="checkbox"/> |
|-----------------------------------------------|-----------------------------------------------|--------------------------------------------------------|--------------------------------------------|--------------------------------------------|

☐ Impacts on natural environment (changes in coastal landscape, impacts on vegetation, crops, wild animals and livestock, etc.)

|                                               |                                               |                                                        |                                            |                                            |
|-----------------------------------------------|-----------------------------------------------|--------------------------------------------------------|--------------------------------------------|--------------------------------------------|
| Strongly disagree<br><input type="checkbox"/> | Somewhat disagree<br><input type="checkbox"/> | Neither agree nor disagree<br><input type="checkbox"/> | Somewhat agree<br><input type="checkbox"/> | Strongly Agree<br><input type="checkbox"/> |
|-----------------------------------------------|-----------------------------------------------|--------------------------------------------------------|--------------------------------------------|--------------------------------------------|

☐ Impacts on the economy and work (destruction of coastal enterprises, damages to tourism industry, scarcity of financial resources, etc.)

|                                               |                                               |                                                        |                                            |                                            |
|-----------------------------------------------|-----------------------------------------------|--------------------------------------------------------|--------------------------------------------|--------------------------------------------|
| Strongly disagree<br><input type="checkbox"/> | Somewhat disagree<br><input type="checkbox"/> | Neither agree nor disagree<br><input type="checkbox"/> | Somewhat agree<br><input type="checkbox"/> | Strongly Agree<br><input type="checkbox"/> |
|-----------------------------------------------|-----------------------------------------------|--------------------------------------------------------|--------------------------------------------|--------------------------------------------|

## SECTION 4: REPRESENTATION OF TSUNAMIS

**23) How far do you agree with the following statements?**

☐ When you feel a strong earthquake near the coast one should flee to the beach

|                                               |                                               |                                                        |                                            |                                            |
|-----------------------------------------------|-----------------------------------------------|--------------------------------------------------------|--------------------------------------------|--------------------------------------------|
| Strongly disagree<br><input type="checkbox"/> | Somewhat disagree<br><input type="checkbox"/> | Neither agree nor disagree<br><input type="checkbox"/> | Somewhat agree<br><input type="checkbox"/> | Strongly Agree<br><input type="checkbox"/> |
|-----------------------------------------------|-----------------------------------------------|--------------------------------------------------------|--------------------------------------------|--------------------------------------------|

☐ A tsunami waves can flood the coastal inlands for kilometers

|                                               |                                               |                                                        |                                            |                                            |
|-----------------------------------------------|-----------------------------------------------|--------------------------------------------------------|--------------------------------------------|--------------------------------------------|
| Strongly disagree<br><input type="checkbox"/> | Somewhat disagree<br><input type="checkbox"/> | Neither agree nor disagree<br><input type="checkbox"/> | Somewhat agree<br><input type="checkbox"/> | Strongly Agree<br><input type="checkbox"/> |
|-----------------------------------------------|-----------------------------------------------|--------------------------------------------------------|--------------------------------------------|--------------------------------------------|

☐ A half-metre tsunami wave can drag an adult man into the sea

|                                               |                                               |                                                        |                                            |                                            |
|-----------------------------------------------|-----------------------------------------------|--------------------------------------------------------|--------------------------------------------|--------------------------------------------|
| Strongly disagree<br><input type="checkbox"/> | Somewhat disagree<br><input type="checkbox"/> | Neither agree nor disagree<br><input type="checkbox"/> | Somewhat agree<br><input type="checkbox"/> | Strongly Agree<br><input type="checkbox"/> |
|-----------------------------------------------|-----------------------------------------------|--------------------------------------------------------|--------------------------------------------|--------------------------------------------|

☐ Sometimes tsunamis can be preceded by sea withdrawal, even for several tens of metres.

|                                               |                                               |                                                        |                                            |                                            |
|-----------------------------------------------|-----------------------------------------------|--------------------------------------------------------|--------------------------------------------|--------------------------------------------|
| Strongly disagree<br><input type="checkbox"/> | Somewhat disagree<br><input type="checkbox"/> | Neither agree nor disagree<br><input type="checkbox"/> | Somewhat agree<br><input type="checkbox"/> | Strongly Agree<br><input type="checkbox"/> |
|-----------------------------------------------|-----------------------------------------------|--------------------------------------------------------|--------------------------------------------|--------------------------------------------|

☐ In the Mediterranean sea tsunami with waves higher than twenty meters are possible

|                                               |                                               |                                                        |                                            |                                            |
|-----------------------------------------------|-----------------------------------------------|--------------------------------------------------------|--------------------------------------------|--------------------------------------------|
| Strongly disagree<br><input type="checkbox"/> | Somewhat disagree<br><input type="checkbox"/> | Neither agree nor disagree<br><input type="checkbox"/> | Somewhat agree<br><input type="checkbox"/> | Strongly Agree<br><input type="checkbox"/> |
|-----------------------------------------------|-----------------------------------------------|--------------------------------------------------------|--------------------------------------------|--------------------------------------------|

## SECTION 5: CULTURAL ATTITUDES AND WORLDVISION

### 24) How far do you agree with the following statements?

☐ To move on in life you have to work hard and do what you are told to do

|                                               |                                               |                                                        |                                            |                                            |
|-----------------------------------------------|-----------------------------------------------|--------------------------------------------------------|--------------------------------------------|--------------------------------------------|
| Strongly disagree<br><input type="checkbox"/> | Somewhat disagree<br><input type="checkbox"/> | Neither agree nor disagree<br><input type="checkbox"/> | Somewhat agree<br><input type="checkbox"/> | Strongly Agree<br><input type="checkbox"/> |
|-----------------------------------------------|-----------------------------------------------|--------------------------------------------------------|--------------------------------------------|--------------------------------------------|

☐ When a natural disaster occurs, authorities should impose severe and immediate punishment on those who break the rules

|                                               |                                               |                                                        |                                            |                                            |
|-----------------------------------------------|-----------------------------------------------|--------------------------------------------------------|--------------------------------------------|--------------------------------------------|
| Strongly disagree<br><input type="checkbox"/> | Somewhat disagree<br><input type="checkbox"/> | Neither agree nor disagree<br><input type="checkbox"/> | Somewhat agree<br><input type="checkbox"/> | Strongly Agree<br><input type="checkbox"/> |
|-----------------------------------------------|-----------------------------------------------|--------------------------------------------------------|--------------------------------------------|--------------------------------------------|

☐ The healthiest society is the one based on competition between individuals

|                                               |                                               |                                                        |                                            |                                            |
|-----------------------------------------------|-----------------------------------------------|--------------------------------------------------------|--------------------------------------------|--------------------------------------------|
| Strongly disagree<br><input type="checkbox"/> | Somewhat disagree<br><input type="checkbox"/> | Neither agree nor disagree<br><input type="checkbox"/> | Somewhat agree<br><input type="checkbox"/> | Strongly Agree<br><input type="checkbox"/> |
|-----------------------------------------------|-----------------------------------------------|--------------------------------------------------------|--------------------------------------------|--------------------------------------------|

☐ To deal with natural disasters individuals should prepare themselves before instead of waiting for someone to help them after

|                                               |                                               |                                                        |                                            |                                            |
|-----------------------------------------------|-----------------------------------------------|--------------------------------------------------------|--------------------------------------------|--------------------------------------------|
| Strongly disagree<br><input type="checkbox"/> | Somewhat disagree<br><input type="checkbox"/> | Neither agree nor disagree<br><input type="checkbox"/> | Somewhat agree<br><input type="checkbox"/> | Strongly Agree<br><input type="checkbox"/> |
|-----------------------------------------------|-----------------------------------------------|--------------------------------------------------------|--------------------------------------------|--------------------------------------------|

☐ Many conflicts could be resolved by a fairer division of workload and natural resources

|                                               |                                               |                                                        |                                            |                                            |
|-----------------------------------------------|-----------------------------------------------|--------------------------------------------------------|--------------------------------------------|--------------------------------------------|
| Strongly disagree<br><input type="checkbox"/> | Somewhat disagree<br><input type="checkbox"/> | Neither agree nor disagree<br><input type="checkbox"/> | Somewhat agree<br><input type="checkbox"/> | Strongly Agree<br><input type="checkbox"/> |
|-----------------------------------------------|-----------------------------------------------|--------------------------------------------------------|--------------------------------------------|--------------------------------------------|

☐ Natural disasters do not exist: it is only nature offended by man's arrogance and greediness, that rebels

|                                               |                                               |                                                        |                                            |                                            |
|-----------------------------------------------|-----------------------------------------------|--------------------------------------------------------|--------------------------------------------|--------------------------------------------|
| Strongly disagree<br><input type="checkbox"/> | Somewhat disagree<br><input type="checkbox"/> | Neither agree nor disagree<br><input type="checkbox"/> | Somewhat agree<br><input type="checkbox"/> | Strongly Agree<br><input type="checkbox"/> |
|-----------------------------------------------|-----------------------------------------------|--------------------------------------------------------|--------------------------------------------|--------------------------------------------|

☐ When you do something for others you should not expect gratefulness

|                                               |                                               |                                                        |                                            |                                            |
|-----------------------------------------------|-----------------------------------------------|--------------------------------------------------------|--------------------------------------------|--------------------------------------------|
| Strongly disagree<br><input type="checkbox"/> | Somewhat disagree<br><input type="checkbox"/> | Neither agree nor disagree<br><input type="checkbox"/> | Somewhat agree<br><input type="checkbox"/> | Strongly Agree<br><input type="checkbox"/> |
|-----------------------------------------------|-----------------------------------------------|--------------------------------------------------------|--------------------------------------------|--------------------------------------------|

☐ Natural disasters serve to remind us that making plans is useless: our lives are determined by forces that we cannot control

|                                               |                                               |                                                        |                                            |                                            |
|-----------------------------------------------|-----------------------------------------------|--------------------------------------------------------|--------------------------------------------|--------------------------------------------|
| Strongly disagree<br><input type="checkbox"/> | Somewhat disagree<br><input type="checkbox"/> | Neither agree nor disagree<br><input type="checkbox"/> | Somewhat agree<br><input type="checkbox"/> | Strongly Agree<br><input type="checkbox"/> |
|-----------------------------------------------|-----------------------------------------------|--------------------------------------------------------|--------------------------------------------|--------------------------------------------|

## SECTION 6: MESSAGES AND CHANNELS TO SPREAD TSUNAMI ALERT

25) In your opinion, is it possible to spread an early warning before the arrival of a tsunami on the way to the coast?

☐ Yes      ☐ No      ☐ I don't know (If answer is "not" or "I don't know" go to 25)

26) In your opinion, who should warn population about the impending arrival of a tsunami on the way to the coast?

1. \_\_\_\_\_
2. \_\_\_\_\_
3. \_\_\_\_\_

27) If a tsunami would hit your region's coastline, which channels would you prefer to receive an early warning? (max three answers)

|                                                                         |
|-------------------------------------------------------------------------|
| <input type="checkbox"/> Television                                     |
| <input type="checkbox"/> Radio                                          |
| <input type="checkbox"/> Internet and social media                      |
| <input type="checkbox"/> E-mail                                         |
| <input type="checkbox"/> Phone call (mobile or fixed telephone)         |
| <input type="checkbox"/> Be advised by friends, neighbours or relatives |
| <input type="checkbox"/> SMS                                            |
| <input type="checkbox"/> Smartphone application from official sources   |
| <input type="checkbox"/> Sirens or other acoustic devices               |
